# Supplementary material
Source: PubMed Central journal article supplement (PMC10281539)

Fig 2B

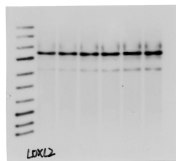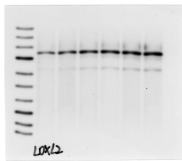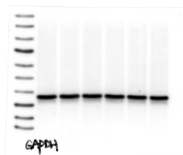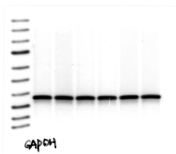

Fig 3A

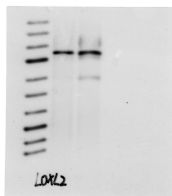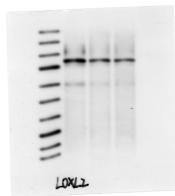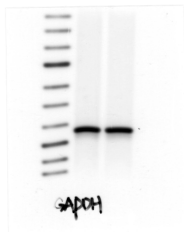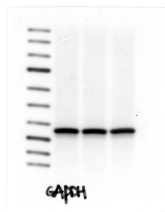

Fig 8A HCT116

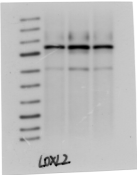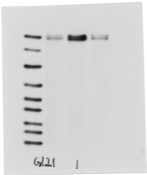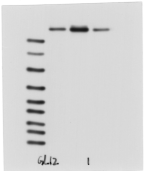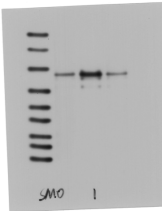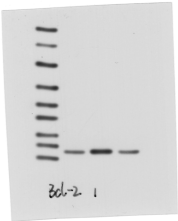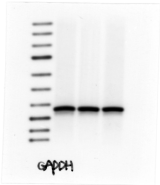

Fig 8A SW48

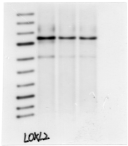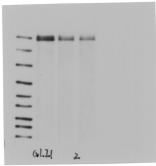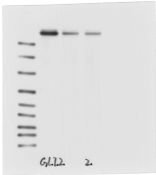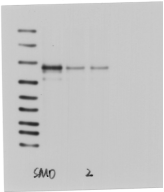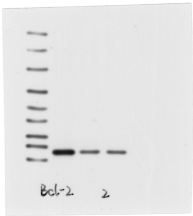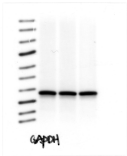

Fig 9C

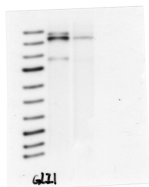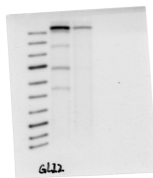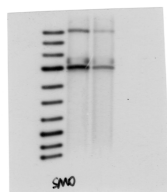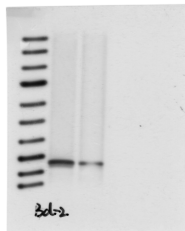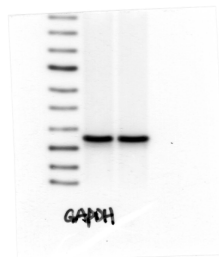

Supplement: sj-pdf-1-ebm-10.1177_15353702221139203.pdf [file sj-pdf-1-ebm-10.1177_15353702221139203.pdf]
